# Supplementary material for: Hedgehog signaling promotes tumor-associated macrophage polarization to suppress intratumoral CD8+ T cell recruitment
Source: JCI journal article supplement (doi:10.1172/jci128644), 2019-10-21
Supplement: sd1 [file 1]

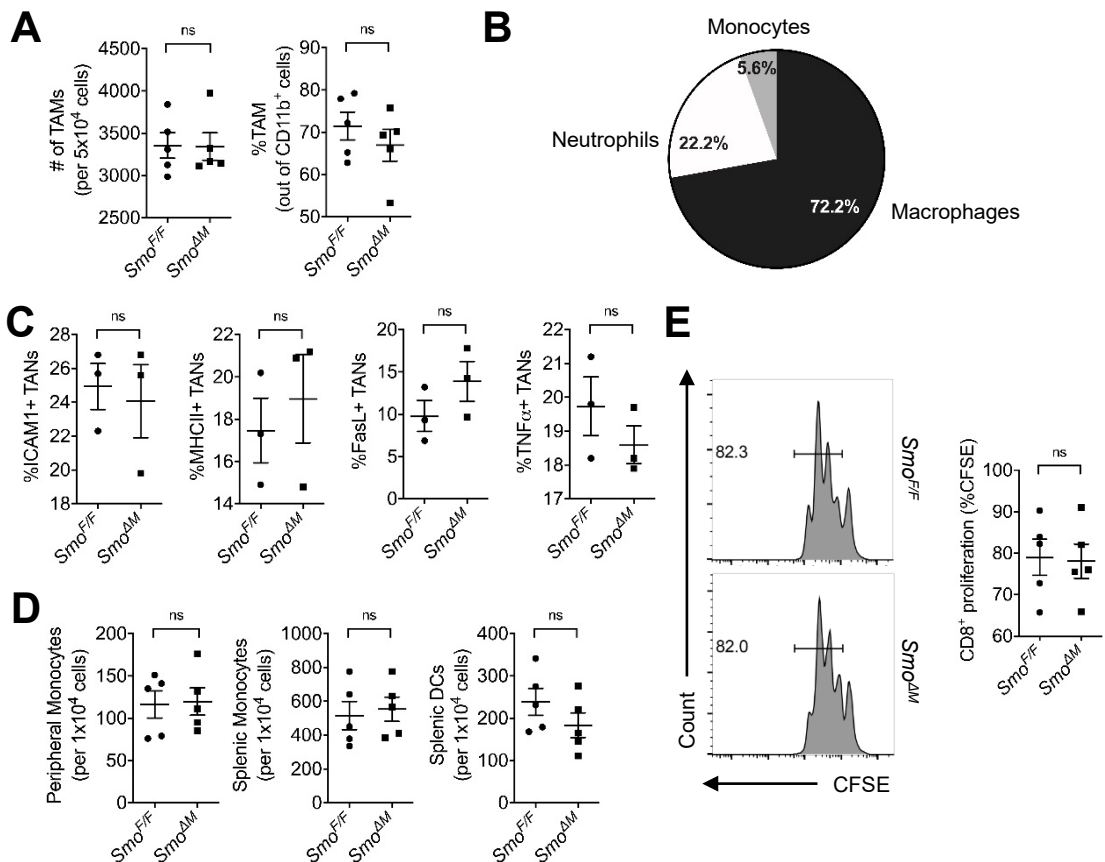

**Supplemental Figure 1. Myeloid-specific *Smo* deletion does not impact myeloid cell numbers.** (A) Number and percentage of F4/80<sup>+</sup>CD11b<sup>+</sup> tumor-associated macrophages (TAMs) in Hepa1-6 tumor stroma were enumerated by FACS. (B) Percentages of F4/80<sup>+</sup>CD11b<sup>+</sup> macrophages, Ly6G<sup>+</sup>CD11b<sup>+</sup> neutrophils and Ly6C<sup>+</sup>CD11b<sup>+</sup> monocytes in the TME were assessed using FACS. (C) Expressions of ICAM1, MHCII, FasL and TNFα in tumor-associated neutrophils (TANS) were measured with FACS. (D) Numbers of CD11b<sup>+</sup>Ly6C<sup>+</sup> monocytes in circulation and the spleen and CD11c<sup>+</sup>MHCII<sup>+</sup> dendritic cells (DCs) in the spleen of *Smo<sup>F/F</sup>* and *Smo<sup>ΔM</sup>* mice were measured by FACS. (E) Representative CFSE staining of OT1<sup>+</sup> CD8<sup>+</sup> T cells co-cultured with Ova-I peptide-pulsed DCs isolated from *Smo<sup>F/F</sup>* and *Smo<sup>ΔM</sup>* mice measured by FACS. Values are mean ± SEM of a minimum of two independent experiments. ns = no significance. n=5 biological replicates per group (A, B, D & E). N = 3 biological replicates per group (C). 2-tailed Student's t-test (A, C, D & E)

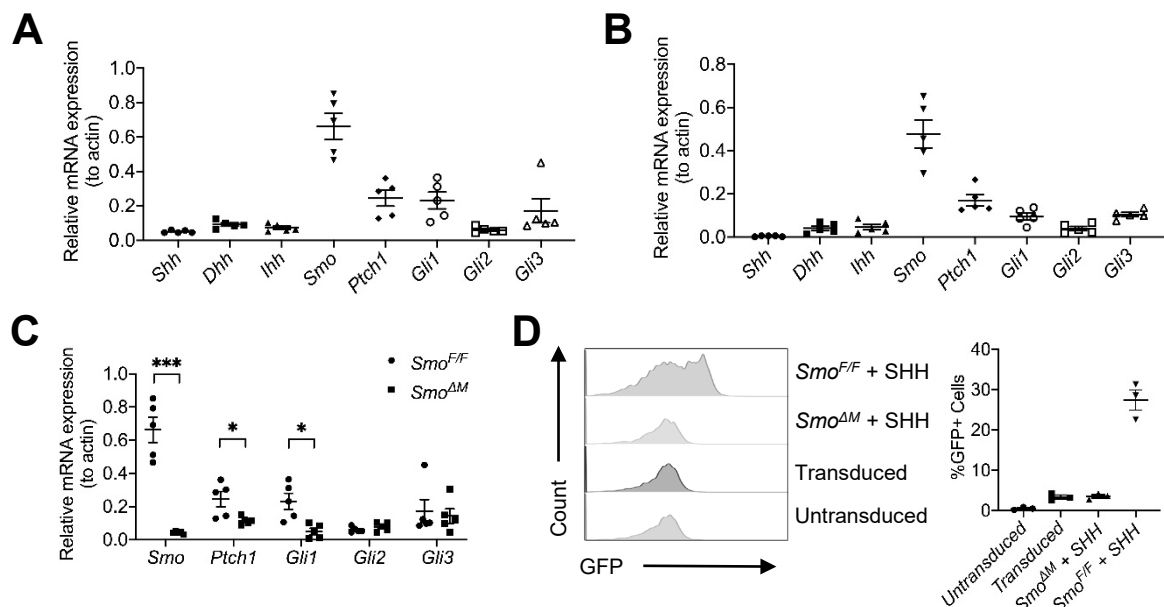

**Supplemental Figure 2. Hedgehog signaling is active in macrophages.** Expression levels of *Shh*, *Dhh*, *Ihh*, *Smo*, *Ptch1*, *Gli1*, *Gli2* and *Gli3* in TAMs (A) and macrophages (B) were measured by qRT-PCR and normalized to  $\beta$ -actin. (C) Expression levels of *Smo*, *Ptch1* and *Gli1* in *Smo*<sup>F/F</sup> and *Smo*<sup>ΔM</sup> TAMs measured by qRT-PCR. (D) Representative plot of GFP activity in macrophages untransduced or transduced with pGreenFire-Gli reporter. Data representative of a minimum of 2 independent experiments. \*P<0.05. \*\*\*P<0.0005. Values are mean  $\pm$  SEM. n=5 biological replicates per group (A-C). n=3 technical replicates per group (D). 2-tailed Student's t-test (C).

**A**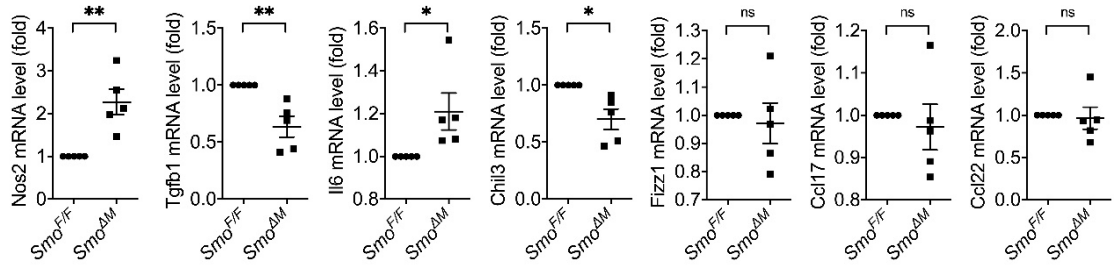**B**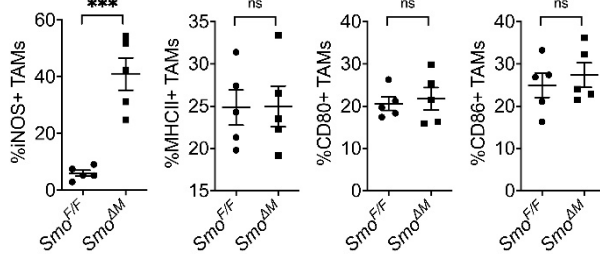**C**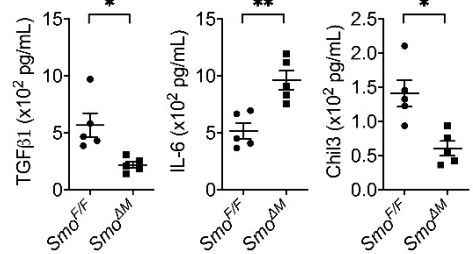

**Supplemental Figure 3. Loss of Hh signaling in myeloid cells interferes with M2-polarization of TAMs in subcutaneously implanted HCC. (A)** Expression levels of *Nos2*, *Tgfb1*, *il6*, *Chil3*, *Fizz1*, *Ccl17* and *Ccl22* in TAMs were measured by qRT-PCR. Expressions were normalized to  $\beta$ -actin and compared to *Smo<sup>F/F</sup>* TAMs. **(B)** Expressions of iNOS, MHCII, CD80 and CD86 in TAMs were measured by FACS. **(C)** TGFβ1, IL-6 and Chil3 secretion from TAMs were measured by CBA and ELISA. Values are mean  $\pm$  SEM of a minimum of three independent experiments. ns = no significance. \*P<0.05. \*\*P<0.005. \*\*\*P<0.0005. n=5 biological replicates per group **(A-C)**. 2-tailed Student's t-test **(A-C)**.

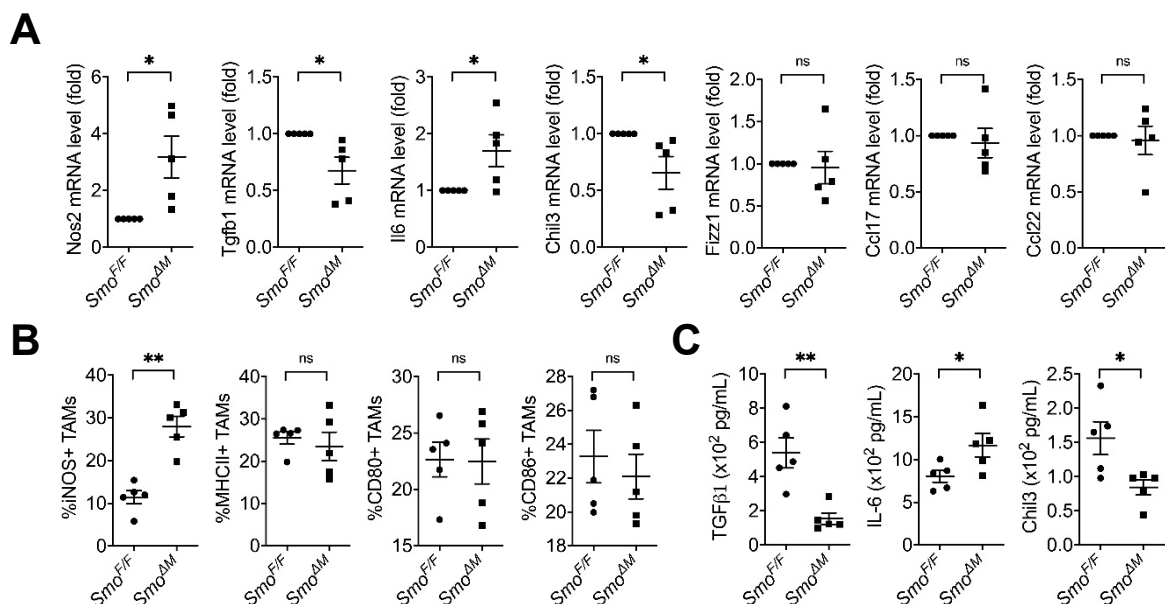

**Supplemental Figure 4. Loss of Hh signaling in myeloid cells interferes with M2-polarization of TAMs in autochthonous HCC.**

**(A)** Expression levels of *Nos2*, *Tgfb1*, *il6*, *Chil3*, *Fizz1*, *Ccl17* and *Ccl22* in TAMs were measured by qRT-PCR. Expressions were normalized to  $\beta$ -actin and compared to *Smo<sup>F/F</sup>MDR2<sup>-/-</sup>* TAMs. **(B)** Expressions of CD206, iNOS, CD80 and CD86 in TAMs were measured by FACS. **(C)** TGFβ1, IL-6 and Chil3 secretion from TAMs were measured by CBA and ELISA. Values are mean  $\pm$  SEM of a minimum of three independent experiments. ns = no significance. \*P<0.05. \*\*P<0.005. \*\*\*P<0.0005. n=5 biological replicates per group **(A-C)**. 2-tailed Student's t-test **(A-C)**.

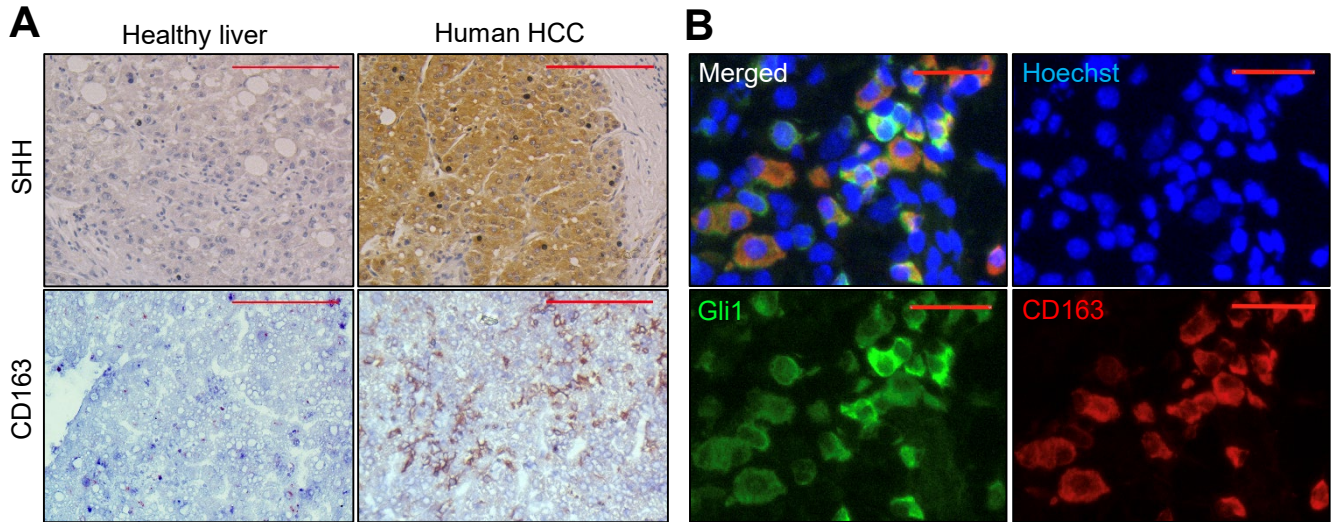

**Supplemental Figure 5. Human M2 TAMs express Gli1 in HCC tumors with high SHH activity.** (A) Representative immunohistochemical staining of SHH and CD163 in human HCC tumor samples with matched healthy liver controls. Scale bar = 100  $\mu$ m. (B) Representative immunofluorescent staining of Gli1 (green), CD163 (red) and nuclei (blue) with human HCC tumor samples. Scaled bar = 25  $\mu$ m. n = 3 biological replicates (A & B).

**A**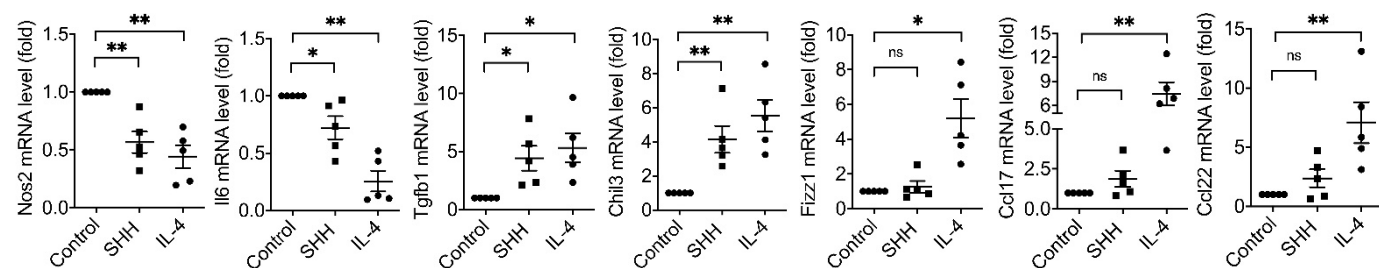**B**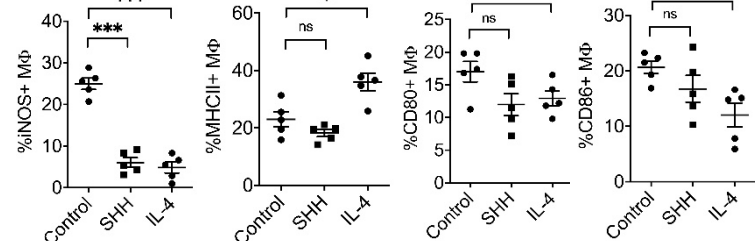**C**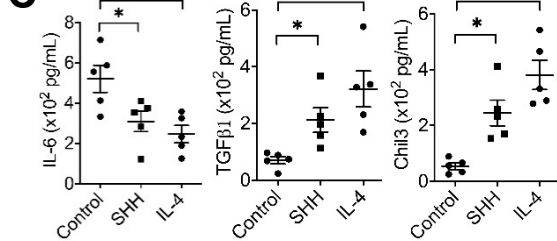

**Supplemental Figure 6. Effects of SHH treatment on macrophages *in vitro*.** (A) *Nos2*, *Il6*, *Tgfb1*, *Chil3*, *Fizz1*, *Ccl17* and *Ccl22* mRNA expression levels in Mφ were measured by qRT-PCR. Expressions were normalized to  $\beta$ -actin and compared to control. (B) Expressions of iNOS, MHCII, CD80 and CD86 in Mφ were measured by FACS. (C) IL-6, TGFβ1 and Chil3 secretions from Mφ were measured by CBA and ELISA. Values are mean  $\pm$  SEM of a minimum of three independent experiments. ns = no significance. \*P<0.05. \*\*P<0.005. \*\*\*P<0.0005. n=5 biological replicates per group (A-C). One-way ANOVA (A-C).

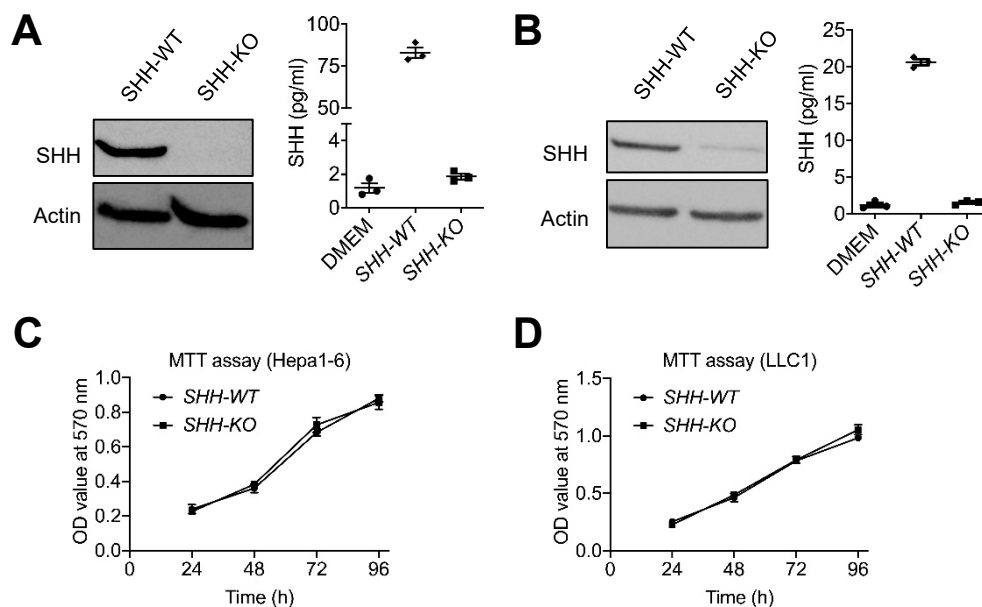

**Supplemental Figure 7. Generation of SHH knocked-out tumor cell lines using the CRISPR-Cas9 technology.** CRISPR-Cas9 knockout status of *SHH* in Hepa1-6 (**A**) and LLC1 (**B**) cells was confirmed with ELISA and Western blotting. Deletion of SHH in Hepa1-6 (**C**) and LLC1 (**D**) cells did not affect cell viability as shown by MTT assay. Values are mean  $\pm$  SEM of a minimum of two independent experiments.  $n=3$  technical replicates per group (**A-D**).

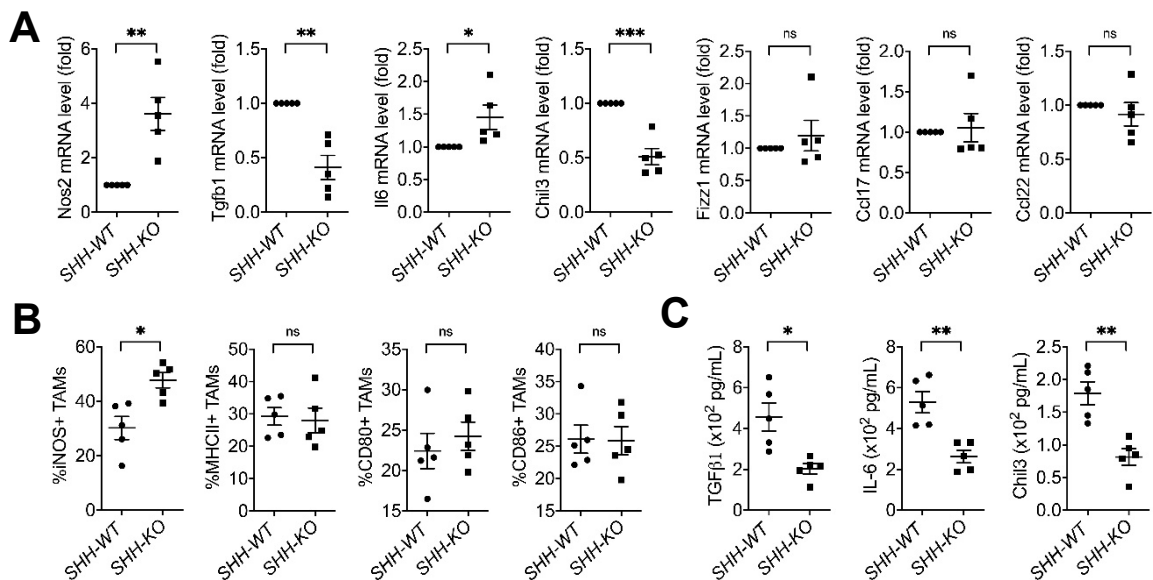

**Supplemental Figure 8. Tumor-derived SHH from Hepa1-6 hepatoma promotes TAM M2-polarization *in vivo*. (A)**

Expression levels of *Nos2*, *Tgfb1*, *il6*, *Chil3*, *Fizz1*, *Ccl17* and *Ccl22* in TAMs purified from Hepa1-6 *SHH-WT* and Hepa1-6 *SHH-KO* tumor samples were measured by qRT-PCR. Expressions were normalized to  $\beta$ -actin and compared to *SHH-WT* TAMs. **(B)** Expressions of iNOS, MHCII, CD80 and CD86 in TAMs were measured by FACS. **(C)** TGFβ1, IL-6 and Chil3 secretion from TAMs were measured by CBA and ELISA. Values are mean ± SEM of a minimum of three independent experiments. ns = no significance. \*P<0.05. \*\*P<0.005. \*\*\*P<0.0005. n=5 biological replicates per group **(A-C)**. 2-tailed Student's t-test **(A-C)**.



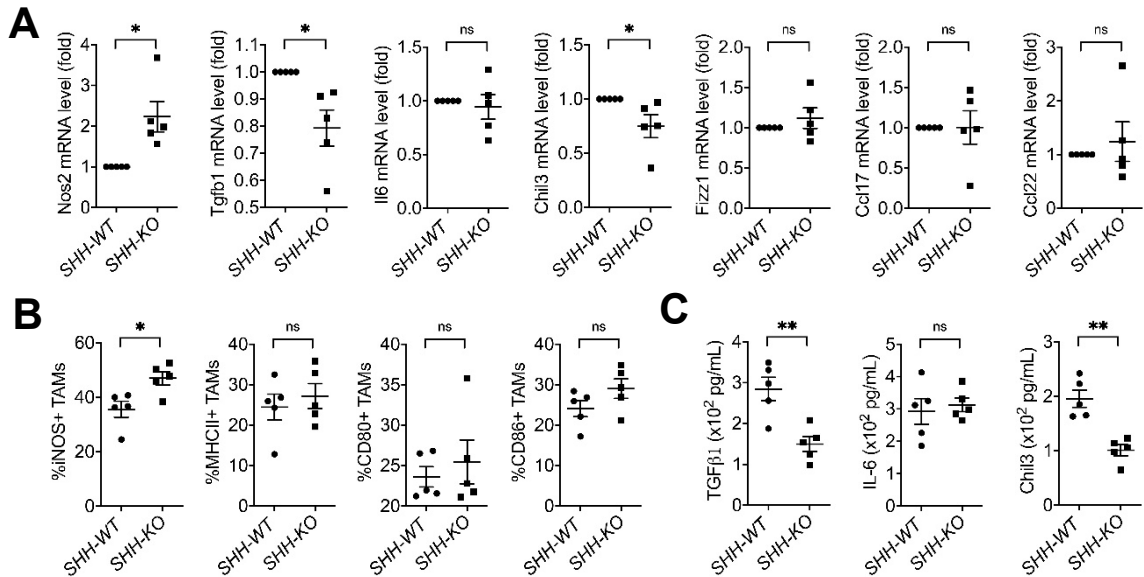

**Supplemental Figure 9. Tumor-derived SHH from LLC1 Lewis lung carcinoma promotes TAM M2-polarization *in vivo*.** (A) Expression levels of *Nos2*, *Tgfb1*, *il6*, *Chil3*, *Fizz1*, *Ccl17* and *Ccl22* in TAMs purified from LLC1 *SHH-WT* and Hepa1-6 *SHH-KO* tumor samples were measured by qRT-PCR. Expressions were normalized to  $\beta$ -actin and compared to *SHH-WT* TAMs. (B) Expressions of iNOS, MHCII, CD80 and CD86 in TAMs were measured by FACS. (C) TGFβ1, IL-6 and Chil3 secretion from TAMs were measured by CBA and ELISA. Values are mean ± SEM of a minimum of three independent experiments. ns = no significance. \*P<0.05. \*\*P<0.005. \*\*\*P<0.0005. n=5 biological replicates per group (A-C). 2-tailed Student's t-test (A-C).

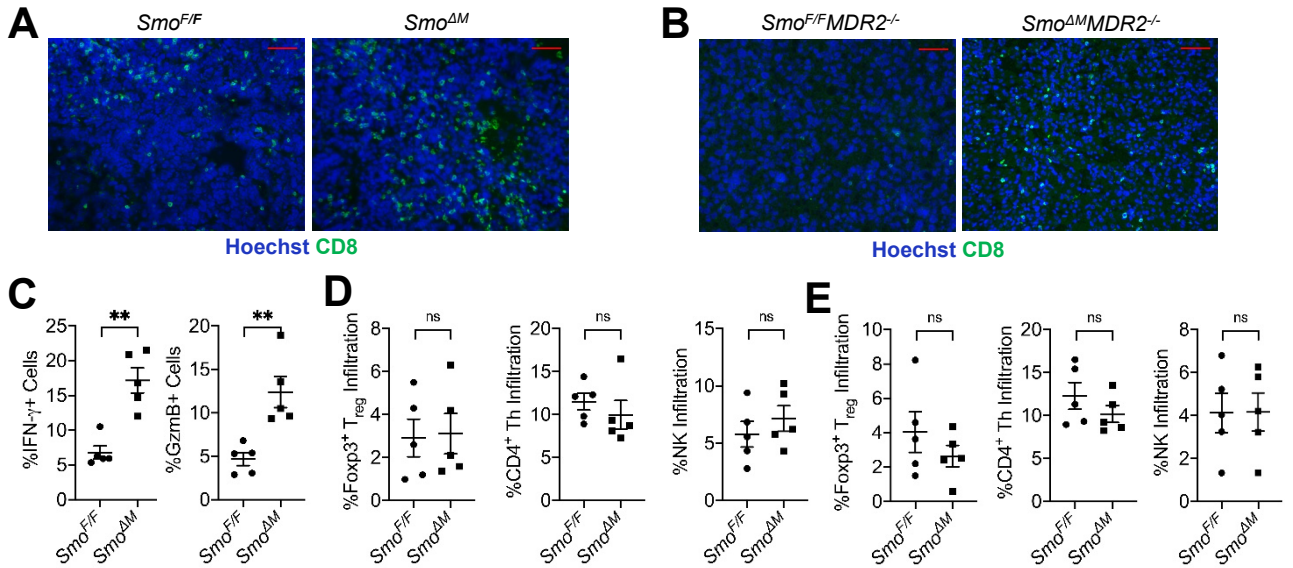

**Supplemental Figure 10. Characterizing the effects of *Smo* deletion in myeloid cells on other tumor-infiltrating immune cells.** (A) Representative IF staining of CD8<sup>+</sup> T cells in Hepa1-6 tumors inoculated in *Smo<sup>F/F</sup>* and *Smo<sup>ΔM</sup>* mice and (B) autochthonous HCC from *Smo<sup>F/F</sup>MDR2<sup>-/-</sup>* and *Smo<sup>ΔM</sup>MDR2<sup>-/-</sup>* mice. CD8<sup>+</sup> T cells were stained with Alexa Fluor488 labeled anti-CD8a antibody (green) and nuclear Hoechst staining (blue). Scale bar = 100 μm. (C) Intracellular production of IFNγ and GranzymeB in *Smo<sup>F/F</sup>* and *Smo<sup>ΔM</sup>* TAMs were measured by FACS. (D) Percentages of CD4<sup>+</sup>Foxp3<sup>+</sup> T<sub>reg</sub>, CD4<sup>+</sup> T cell and CD3<sup>+</sup>NK1.1<sup>+</sup> NK cell in the stroma of subcutaneously inoculated Hepa1-6 tumor in *Smo<sup>F/F</sup>* and *Smo<sup>ΔM</sup>* mice. (E) Percentages of CD4<sup>+</sup>Foxp3<sup>+</sup> T<sub>reg</sub>, CD4<sup>+</sup> T cell and CD3<sup>+</sup>NK1.1<sup>+</sup> NK cell in the stroma of autochthonous HCC in *Smo<sup>F/F</sup>MDR2<sup>-/-</sup>* and *Smo<sup>ΔM</sup>MDR2<sup>-/-</sup>* mice. Values are mean ± SEM of a minimum of three independent experiments. ns = no significance. \*\*P<0.005. n=5 biological replicates per group. 2-tailed Student's t-test (C-E).

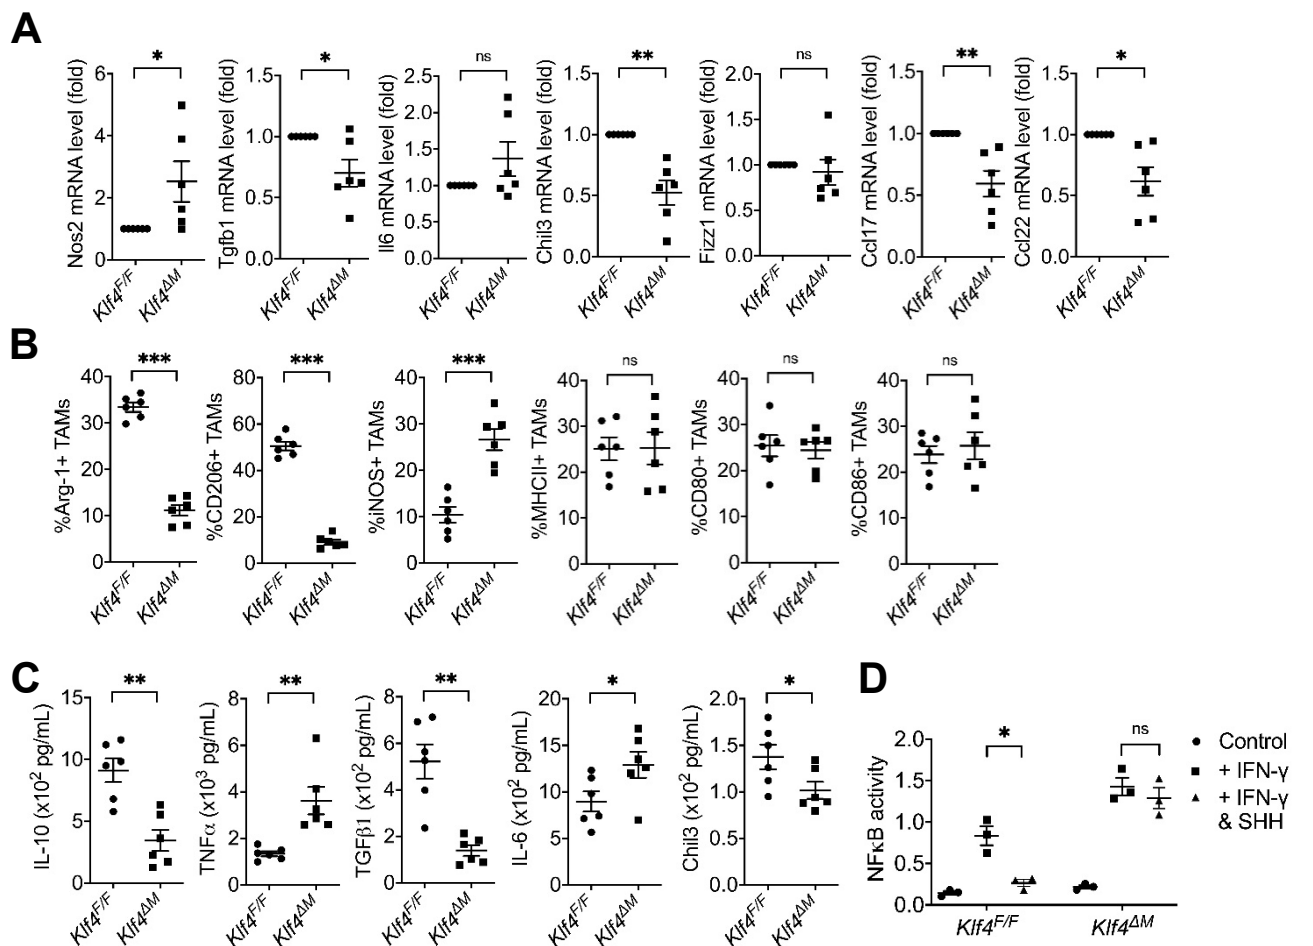

**Supplemental Figure 11. Klf4 is important for TAM M2-polarization *in vivo*.** (A) Expression levels of *Nos2*, *Tgfb1*, *il6*, *Chil3*, *Fizz1*, *Ccl17* and *Ccl22* in *Klf4<sup>F/F</sup>* and *Klf4<sup>ΔM</sup>* TAMs were measured by qRT-PCR. Expressions were normalized to  $\beta$ -actin and compared to *Klf4<sup>F/F</sup>* TAMs. (B) Expressions of Arg-1, CD206, iNOS, MHCII, CD80 and CD86 in TAMs were measured by FACS. (C) IL-10, TNF $\alpha$ , TGF $\beta$ 1, IL-6 and Chil3 secretion from TAMs were measured by ELISA. (D) NF $\kappa$ B p65 activity in the nuclear extract of *Klf4<sup>F/F</sup>* and *Klf4<sup>ΔM</sup>* Mφ untreated (control) or treated with IFN- $\gamma$  and IFN- $\gamma$  + SHH was measured by ELISA. Values are mean  $\pm$  SEM of a minimum of two independent experiments. ns = no significance. \*P<0.05. \*\*P<0.005. \*\*\*P<0.0005. n=6 biological replicates per group (A-C). n=3 technical replicates per group (D). 2-tailed Student's t-test (A-C). Two-way ANOVA (D).

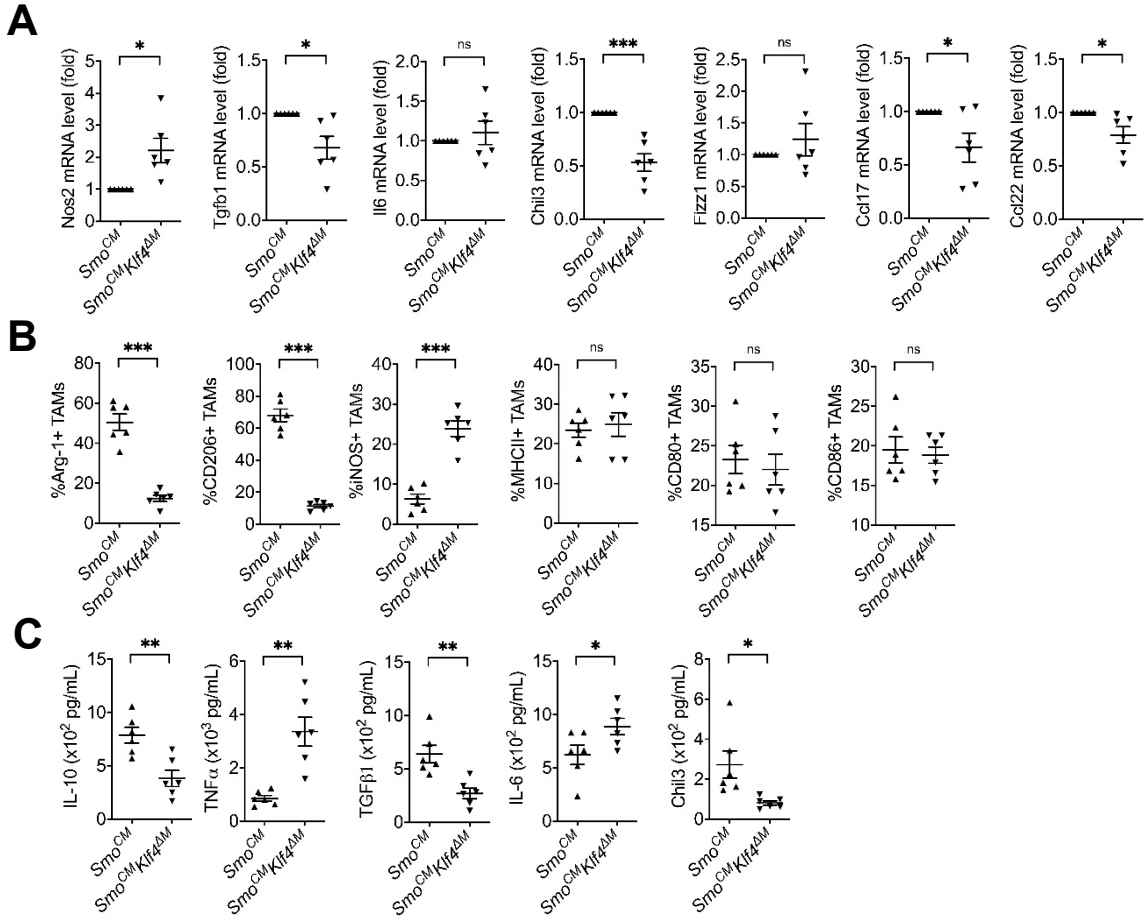

**Supplemental Figure 12. Myeloid-specific deletion of *Klf4* interferes with Hh-induced TAM M2-polarization *in vivo*.**

(A) Expression levels of *Nos2*, *Tgfb1*, *il6*, *Chil3*, *Fizz1*, *Ccl17* and *Ccl22* in Smo<sup>CM</sup> and Smo<sup>CM</sup>Klf4<sup>ΔM</sup> TAMs were measured by qRT-PCR. Expressions were normalized to  $\beta$ -actin and compared to Smo<sup>CM</sup> TAMs. (B) Expressions of Arg-1, CD206, iNOS, MHCII, CD80 and CD86 in TAMs were measured by FACS. (C) IL-10, TNF $\alpha$ , TGF $\beta$ 1, IL-6 and Chil3 secretion from TAMs were measured by ELISA. Values are mean  $\pm$  SEM of a minimum of three independent experiments. ns = no significance. \*P<0.05. \*\*P<0.005. \*\*\*P<0.0005. n=6 biological replicates per group (A-C). 2-tailed Student's t-test (A-C).

**Supplemental Table 1 – Antibodies**

| <b>Antigen</b>     | <b>Fluorophore</b> | <b>Manufacturer</b>       | <b>Clone</b> |
|--------------------|--------------------|---------------------------|--------------|
| F4/80 (mouse)      | APC-Cy7            | BioLegend                 | BM8          |
| CD11b (mouse)      | PE-Cy5             | BioLegend                 | M1/70        |
| Ly6G (mouse)       | PE                 | BioLegend                 | 1A8          |
| Ly6C (mouse)       | PE-Cy7             | BD Biosciences            | AL-21        |
| CD3 (mouse)        | APC                | BioLegend                 | 17A2         |
| CD4 (mouse)        | PE                 | BioLegend                 | GK1.5        |
| CD8a (mouse)       | PE-Cy5             | BioLegend                 | 53-6.7       |
| NK1.1 (mouse)      | PE                 | BioLegend                 | PK136        |
| Foxp3 (mouse)      | FITC               | BioLegend                 | MF-14        |
| CD206 (mouse)      | FITC               | BioLegend                 | CD68C2       |
| MHCII (mouse)      | FITC               | BioLegend                 | M5/114.15.2  |
| CD80 (mouse)       | PE                 | BD Biosciences            | 16-10A1      |
| CD86 (mouse)       | Biotin             | BD Biosciences            | PO3          |
| iNOS (mouse)       | FITC               | BD Biosciences            | Clone 6      |
| Arg-1 (mouse)      | APC                | R&D Systems               | N/A          |
| SHH (human/mouse)  | None               | Cell Signaling Technology | C9C5         |
| Gli1 (human/mouse) | None               | Novus Biologicals         | N/A          |
| CD163 (human)      | None               | Abcam                     | EPR19518     |
| IgG (rabbit)       | Alex Fluor488      | Invitrogen                | N/A          |
| Streptavidin       | APC                | BioLegend                 | N/A          |
| IgG2a, κ           | FITC               | BioLegend                 | RTK2758      |
| IgG2a, κ           | APC                | BioLegend                 | RTK2758      |
| IgG                | PE                 | BioLegend                 | HTK888       |

**Supplemental Table 2 – qRT-PCR primers**

| Target | Direction | Sequence                         |
|--------|-----------|----------------------------------|
| Arg1   | Forward   | 5'-CCACAGTCTGGCAGTTGGAAG-3'      |
|        | Reverse   | 5'-GGTTGTCAGGGGAGTGTTGATG-3'     |
| Nos2   | Forward   | 5'-CCAAGCCCTCACCTACTTCC-3'       |
|        | Reverse   | 5'-CTCTGAGGGCTGACACAAGG-3'       |
| Mrc1   | Forward   | 5'-AAGGCTATCCTGGTGGGAAGAA-3'     |
|        | Reverse   | 5'-AGGGAAGGGTCAGTCTGTGTT-3'      |
| Il10   | Forward   | 5'-GGTTGCCAAGCCTTATCGGA-3'       |
|        | Reverse   | 5'-ACCTGCTCCACTGCCTTGCT-3'       |
| Tnf    | Forward   | 5'-TCTCATGCACCACCATCAAGGACT-3'   |
|        | Reverse   | 5'-TGACCACTCTCCCTTGCAGAACT-3'    |
| Il6    | Forward   | 5'-TCCAGTTGCCTTCTTGGGAC-3'       |
|        | Reverse   | 5'-GTA CTCCAGAAGACCAGAGG-3'      |
| Tgfb1  | Forward   | 5'-AGCTGCTTATCCCAGATTCAGCCA-3'   |
|        | Reverse   | 5'-TATCGAGGCCAGCTTGTTTGAGGA-3'   |
| Chil3  | Forward   | 5'-GGGCATACCTTTATCCTGAG-3'       |
|        | Reverse   | 5'-CCACTGAAGTCATCCATGTC-3'       |
| Fizz1  | Forward   | 5'-CCTGCTGGGATGACTGCTA-3'        |
|        | Reverse   | 5'-TGGGTTCTCCACCTCTTCAT-3'       |
| Ccl17  | Forward   | 5'-TAAGACCTCAGTGGAGTGTC-3'       |
|        | Reverse   | 5'-AAATGCCTCAGCGGGAAGC-3'        |
| Ccl22  | Forward   | 5'-GTGCCGATCCCAGGCAGGTC-3'       |
|        | Reverse   | 5'-GGCGTCGTTGGCAAGGCTCT-3'       |
| Shh    | Forward   | 5'-CTGGCCAGATGTTTTCTGGT-3'       |
|        | Reverse   | 5'-TAAAGGGGTCAGCTTTTTGG-3'       |
| Dhh    | Forward   | 5'-GGGACCTCGTACCCA ACTAC-3'      |
|        | Reverse   | 5'-CTTTGCAACGCTCTGTCATC-3'       |
| Ihh    | Forward   | 5'-CCGAACCTTCATCTTGGTG-3'        |
|        | Reverse   | 5'-ACAGATGGAATGCGTG TGAA-3'      |
| Smo    | Forward   | 5'-GACTCCGTGAGTGGCATCTG-3'       |
|        | Reverse   | 5'-GTGGCAGCTGAAGGTGATGA-3'       |
| Ptch1  | Forward   | 5'-AGGCGCTAATGTTCTGACCA-3'       |
|        | Reverse   | 5'-CCTCCTGCCAATGCATATAC-3'       |
| Gli1   | Forward   | 5'-CCAAGCCA ACTTTATGTCAGGG-3'    |
|        | Reverse   | 5'-TCCTAAAGAAGGGCTCATGGTA-3'     |
| Gli2   | Forward   | 5'-CAACGCCTACTCTCCAGAC-3'        |
|        | Reverse   | 5'-GAGCCTTGATGTACTGTACCAC-3'     |
| Gli3   | Forward   | 5'-GAGCACTTGATGCTCCACAA-3'       |
|        | Reverse   | 5'-GGGTGCTCTTCAGCTTTGAG-3'       |
| Ccl3   | Forward   | 5'-ACTGCCTGCTGCTTCTCCTACA-3'     |
|        | Reverse   | 5'-AGGAAAATGACACCTGGCTGG-3'      |
| Ccl4   | Forward   | 5'-CCATGAAGCTCTGCGTGTCTG-3'      |
|        | Reverse   | 5'-GGCTTGGAGCAAAGACTGCTG-3'      |
| Ccl5   | Forward   | 5'-AGATCTCTGCAGCTGCCCTCA-3'      |
|        | Reverse   | 5'-GGAGCACTTGCTGCTGGTGTAG-3'     |
| Cxcl9  | Forward   | 5'-CCGAGGCACGATCCACTACA-3'       |
|        | Reverse   | 5'-CGAGTCCGGATCTAGGCAGGT-3'      |
| Cxcl10 | Forward   | 5'-GGATGGCTGTCCTAGCTCTG-3'       |
|        | Reverse   | 5'-TGAGCTAGGGAGGACAAGGA-3'       |
| Klf2   | Forward   | 5'-ACAGACTGCTATTTATTGGACCTTAG-3' |
|        | Reverse   | 5'-CAGAACTGGTGGCAGAGTCATTT-3'    |

| Target | Direction | Sequence                       |
|--------|-----------|--------------------------------|
| Klf4   | Forward   | 5'-GGTGCAGCTTGCAGCAGTAA-3'     |
|        | Reverse   | 5'-AAAGTCTAGGTCCAGGAGGTCGTT-3' |
| Stat6  | Forward   | 5'-TCTCCACGAGCTTCACATTG-3'     |
|        | Reverse   | 5'-GACCACCAAGGGCAGAGAC-3'      |
| Cebpb  | Forward   | 5'-GGTTTCGGGACTTGATGCA-3'      |
|        | Reverse   | 5'-CAACAACCCCGCAGGAAC-3'       |
| Pparg  | Forward   | 5'-CGGTTTCAGAAGTGCCTTG-3'      |
|        | Reverse   | 5'-GGTTCAGCTGGTCGATATCAC-3'    |
| Actb   | Forward   | 5'-GGTCCACACCCGCCACCAG-3'      |
|        | Reverse   | 5'-CACATGCCGGAGCCGTTGTC-3'     |
